# Supplementary material
Source: Springer Nature journal article supplement (https://www.springermedizin.de/resource/supplementary/12887_2004_71_MOESM2_ESM.pdf/9477198)

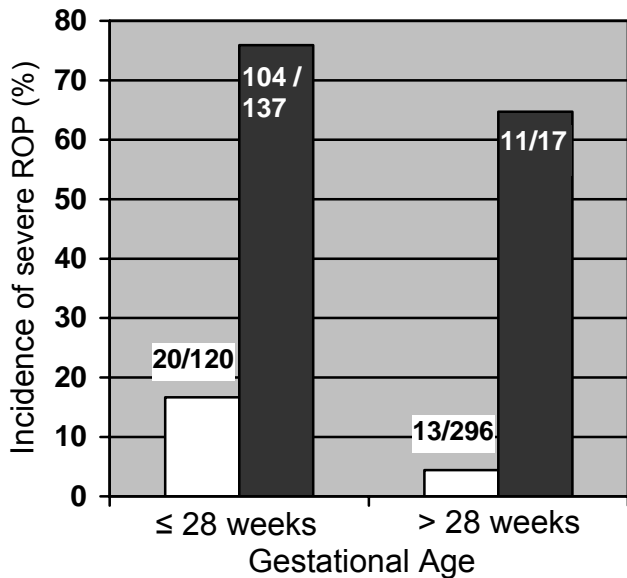

Duration of Ventilation

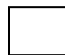

$\leq 2$  weeks

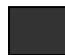

$> 2$  weeks

Supplement: MOESM2 [file 9477198]
